# Supplementary material for: Communication Tools for End-of-Life Decision-Making in Ambulatory Care Settings: A Systematic Review and Meta-Analysis
Source: PubMed Central journal article supplement (PMC4847908; doi:10.1371/journal.pone.0150671), 2016-04-27

# Supporting Information Figures: Sensitivity Analyses

## Primary outcome 1a: Proportion of patients with documented ACP

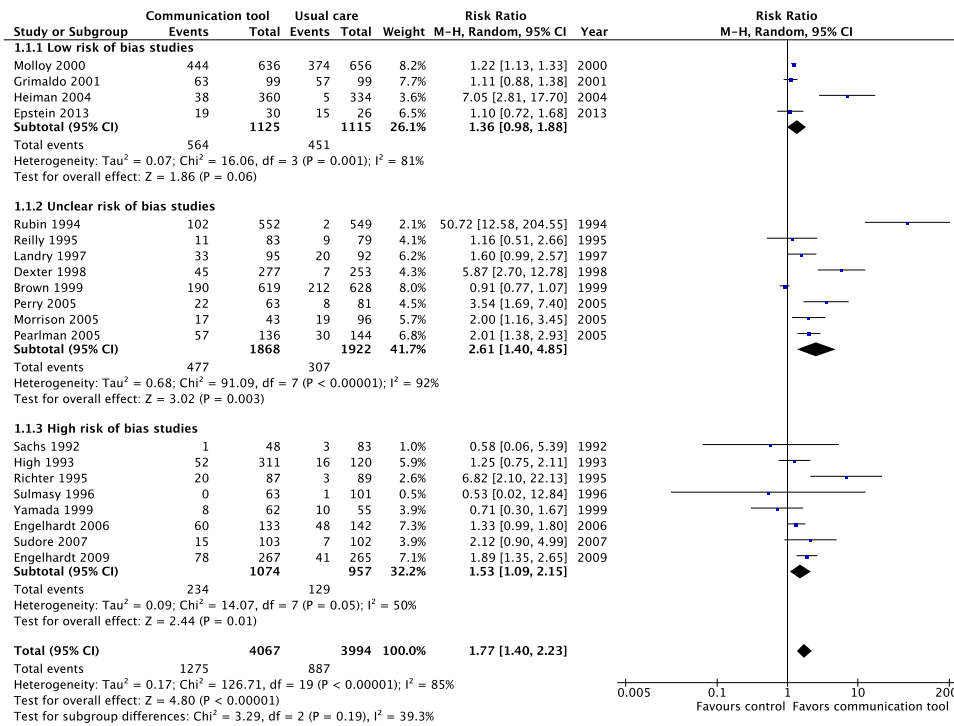

## Primary outcome 1b: Documented ACP discussions

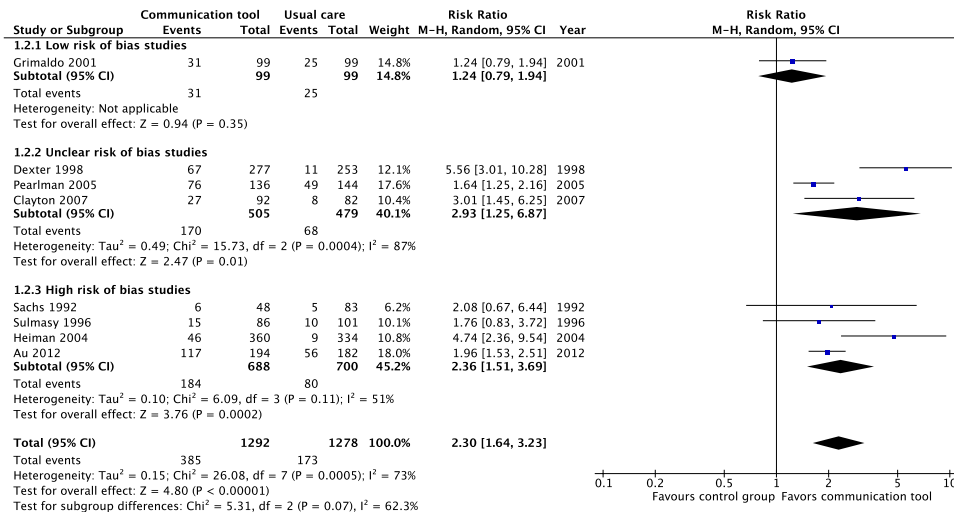

## Secondary outcome 1: Patient preferences for life-prolonging as opposed to comfort care

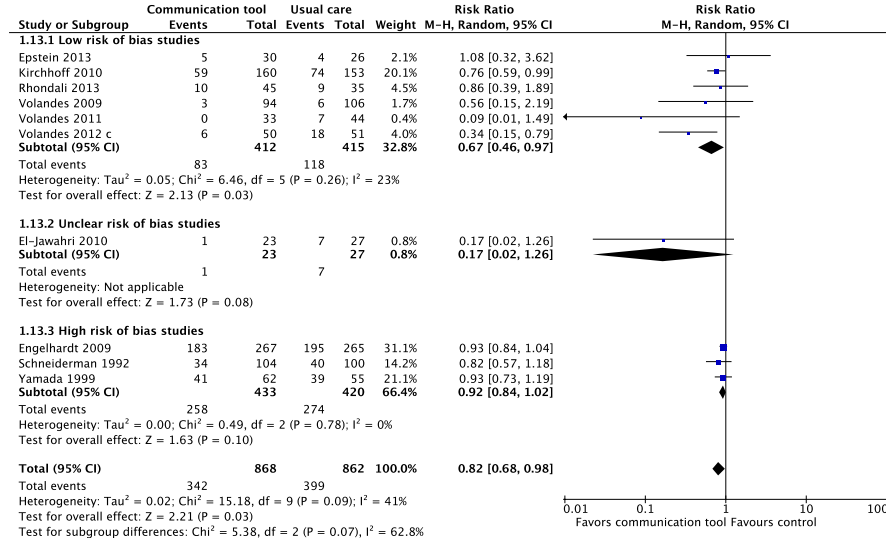

## Secondary outcome 3: Quality of communication score between patient and health care provider

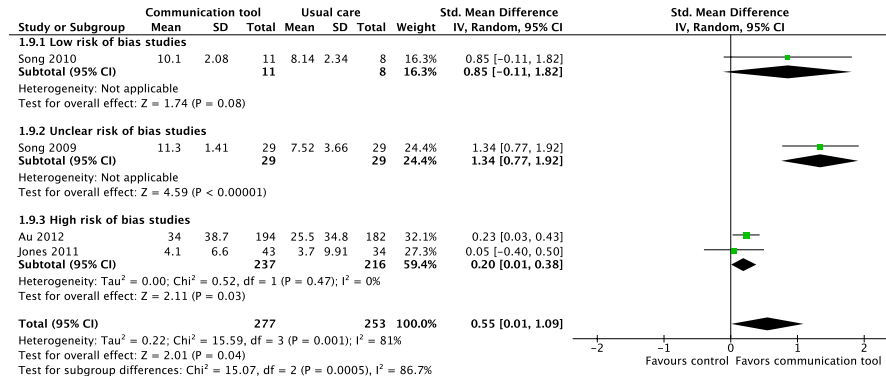

## Secondary outcome 4a: Patient and family knowledge of life supporting treatments

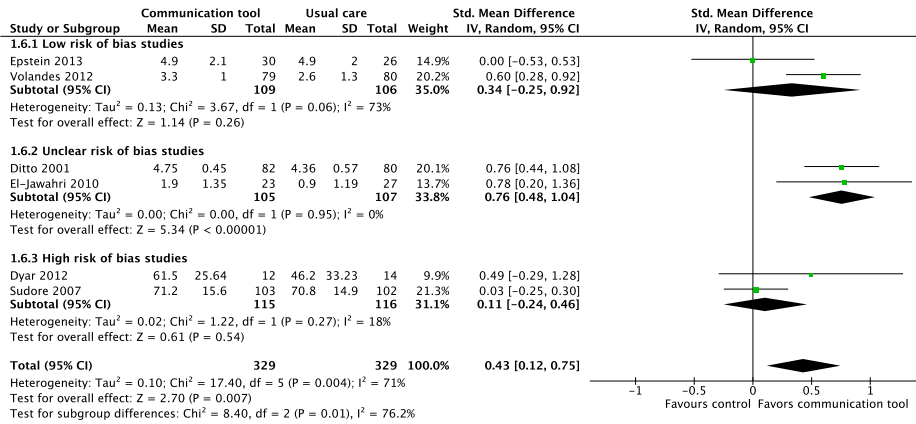

## Secondary outcome 4b: Patient and family knowledge - advance care planning

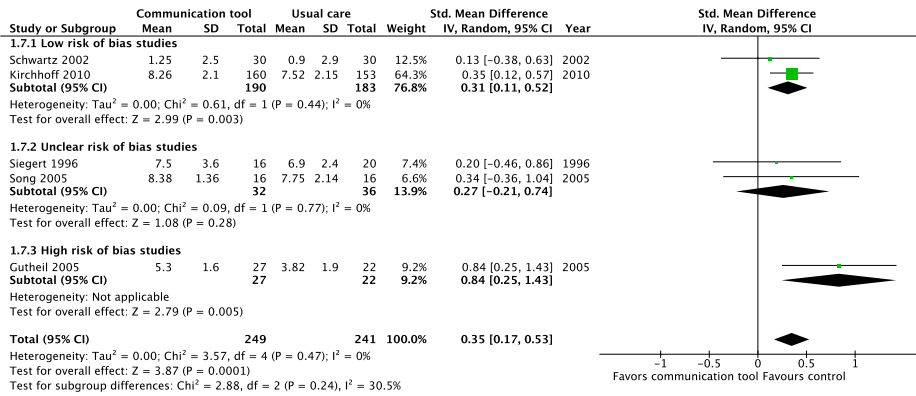

## Secondary outcome 5: Patient and family satisfaction with end-of-life care

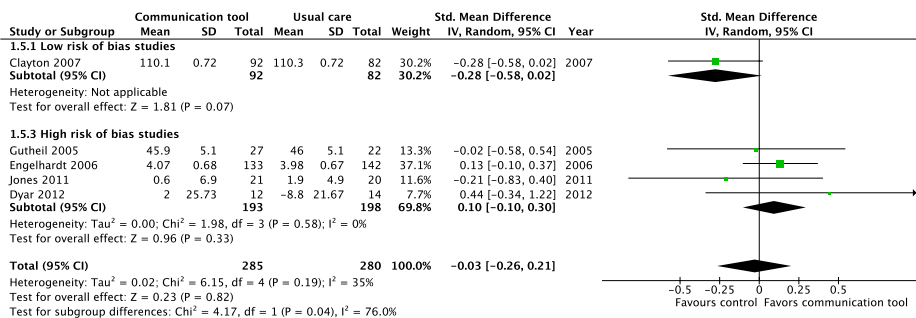

Supplement: pone.0150671.s001.pdf [file pone.0150671.s001.pdf]
