# Supplementary material for: Communication Tools for End-of-Life Decision-Making in Ambulatory Care Settings: A Systematic Review and Meta-Analysis
Source: PubMed Central journal article supplement (PMC4847908; doi:10.1371/journal.pone.0150671), 2016-04-27
Supplement: pone.0150671.s002.pdf [file pone.0150671.s002.pdf]

## S1 Table: Electronic search strategies

### Medline (1946-July 2014)

1. exp Hospital Communication Systems/ or exp Communication/ or exp Health Communication/ or exp Interdisciplinary Communication/ or exp Communication Barriers/ or exp Nonverbal Communication/
2. exp Physician-Patient Relations/ed, es, st [Education, Ethics, Standards]
3. \*Family/ or exp Family Relations/
4. \*Education, Medical, Undergraduate/ or \*Clinical Competence/ or \*Education, Medical, Graduate/
5. (communic\$ adj3 tool\$).mp. [mp=title, abstract, original title, name of substance word, subject heading word, keyword heading word, protocol supplementary concept, rare disease supplementary concept, unique identifier]
6. (communic\$ adj3 skill\$).mp. [mp=title, abstract, original title, name of substance word, subject heading word, keyword heading word, protocol supplementary concept, rare disease supplementary concept, unique identifier]
7. (communic\$ adj3 intervention).mp. [mp=title, abstract, original title, name of substance word, subject heading word, keyword heading word, protocol supplementary concept, rare disease supplementary concept, unique identifier]
8. (education\$ adj3 tool).mp. [mp=title, abstract, original title, name of substance word, subject heading word, keyword heading word, protocol supplementary concept, rare disease supplementary concept, unique identifier]
9. or/1-8
10. decision making/ or choice behavior/ or "dissent and disputes"/ or negotiating/
11. advance directives/ or living wills/ or contracts/ or informed consent/ or consent forms/ or third-party consent/ or presumed consent/ or resuscitation orders/
12. exp patient care planning/ or advance care planning/ or advance directives/ or living wills/ or critical pathways/ or exp patient-centered care/
13. (deci\$ adj3 mak\$).mp. [mp=title, abstract, original title, name of substance word, subject heading word, keyword heading word, protocol supplementary concept, rare disease supplementary concept, unique identifier]
14. advance care planning.mp.
15. or/10-14
16. exp Resuscitation/ or resuscitation.mp. or Cardiopulmonary Resuscitation/
17. exp life support care/ or advanced cardiac life support/ or advanced trauma life support care/
18. exp Terminal Care/ or exp Withholding Treatment/ or exp Life Support Care/ or withdrawing life support.mp. or Euthanasia, Passive/
19. Resuscitation Orders/ or dnr.mp.
20. critical illness/ or emergencies/
21. Emergency Service, Hospital/ or Hospital Rapid Response Team/
22. heart arrest.mp. or Heart Arrest/
23. Respiration, Artificial/ or artificial respiration.mp.
24. or/16-23
24. 9 and 15 and 24

### Embase (1980-July 2014)

1. exp interpersonal communication/
2. family/ or family assessment/ or family decision making/ or family relation/
3. exp medical education/
4. exp doctor patient relation/
5. (communic\$ adj3 tool\$).mp.
6. (communic\$ adj3 skill\$).mp.
7. (communic\$ adj3 intervention).mp.
8. (education\$ adj3 tool).mp.
9. education program/ or educational intervention.mp.
10. or/1-9
11. exp medical decision making/ or decision making.mp. or exp decision making/
12. exp treatment planning/ or exp patient care planning/ or exp living will/ or care planning.mp. or exp decision making/
13. advance\$ directives.mp.
14. advance\$ care plan\$.mp.
15. (deci\$ adj3 mak\$).mp.
16. or/11-15
17. exp resuscitation/ or exp emergency treatment/ or exp intensive care/
18. cardiopulmonary resuscitation.mp.
19. exp heart arrest/ or CPR.mp.
20. exp critical illness/
21. life support.mp.
22. Emergency Service, Hospital/ or Hospital Rapid Response Team/
23. Resuscitation Orders/ or dnr.mp.
24. Respiration, Artificial/ or artificial respiration.mp.
25. exp Terminal Care/ or exp Withholding Treatment/ or exp Life Support Care/ or withdrawing life support.mp. or Euthanasia, Passive/
26. or/17-25
27. 10 and 16 and 26

## CINAHL (1982-July 2014)

| Search ID# | Search Terms                                                                                                                                                                                                                                           | Results |
|------------|--------------------------------------------------------------------------------------------------------------------------------------------------------------------------------------------------------------------------------------------------------|---------|
| S1         | (MH "Communication+") OR "communication" OR (MH "Communication Skills") OR (MH "Communication Skills Training") OR (MH "Communications Media+") OR (MH "Nonverbal Communication+") OR (MH "Communication Protocols+") OR (MH "Communication Barriers") | 379,318 |
| S2         | (MH "Physician-Patient Relations") OR (MH "Professional-Patient Relations+") OR (MH "Nurse-Physician Relations")                                                                                                                                       | 51,346  |
| S3         | (MH "Family+") OR (MH "Family Relations+")                                                                                                                                                                                                             | 97,226  |
| S4         | (MH "Education, Medical+")                                                                                                                                                                                                                             | 14,855  |
| S5         | S1 OR S2 OR S3 OR S4                                                                                                                                                                                                                                   | 496,220 |
| S6         | (MH "Decision Making+") OR (MH "Decision Making, Patient+") OR (MH "Decision Making, Family") OR (MH "Decision Making, Ethical") OR (MH "Decision Making, Clinical")                                                                                   | 50,433  |
| S7         | (MH "Living Wills")                                                                                                                                                                                                                                    | 691     |
| S8         | (MH "Consent+")                                                                                                                                                                                                                                        | 10,526  |
| S9         | (MH "Resuscitation Orders")                                                                                                                                                                                                                            | 1,731   |
| S10        | (MH "Advance Care Planning")                                                                                                                                                                                                                           | 813     |
| S11        | (MH "Advance Directives+")                                                                                                                                                                                                                             | 5,436   |
| S12        | S6 OR S7 OR S8 OR S9 OR S10 OR S11                                                                                                                                                                                                                     | 62,104  |
| S13        | (MH "Resuscitation+") OR (MH "Resuscitation, Cardiopulmonary+") OR (MH "Bystander CPR")                                                                                                                                                                | 19,882  |
| S14        | (MH "Advanced Cardiac Life Support+") OR (MH "Life Support Care")                                                                                                                                                                                      | 2,425   |
| S15        | (MH "Terminal Care+") OR "terminal care" OR (MH "Palliative Care") OR (MH "Terminally Ill Patients+")                                                                                                                                                  | 36,496  |
| S16        | (MH "Euthanasia, Passive") OR (MH "Treatment Refusal") OR (MH "Treatment Related Pain") OR (MH "Treatment Duration")                                                                                                                                   | 10,486  |
| S17        | (MH "Euthanasia, Passive")                                                                                                                                                                                                                             | 2,748   |
| S18        | (MH "Heart Arrest+")                                                                                                                                                                                                                                   | 7,719   |
| S19        | (MH "Emergency Service+")                                                                                                                                                                                                                              | 25,781  |
| S20        | (MH "Respiration, Artificial+") OR (MH "Positive Pressure Ventilation+") OR (MH "Ventilators, Mechanical")                                                                                                                                             | 13,909  |
| S21        | S13 OR S14 OR S15 OR S16 OR S17 OR S18 OR S19 OR S20                                                                                                                                                                                                   | 96,441  |
| S22        | S5 AND S12 AND S21                                                                                                                                                                                                                                     | 3,492   |
| S23        | S5 AND S12 AND S21                                                                                                                                                                                                                                     | 1,304   |

## Cochrane Database of Clinical Controlled Trials (2005-July 2014)

1 (hospital communication systems or communication or health communication or interdisciplinary communication or communication barriers or nonverbal communication).mp. [mp=title, short title, abstract, full text, keywords, caption text] (1410)

2 Physician-Patient Relations.mp. [mp=title, short title, abstract, full text, keywords, caption text] (17)  
3 (Education, Medical, Undergraduate or clinical competence or education, medical graduate).mp. [mp=title, short title, abstract, full text, keywords, caption text] (18)  
4 (communic\$ adj3 tool\$).mp. [mp=title, short title, abstract, full text, keywords, caption text] (19)  
5 (communic\$ adj3 skill\$).mp. [mp=title, short title, abstract, full text, keywords, caption text] (113)  
6 (communic\$ adj3 intervention).mp. [mp=title, short title, abstract, full text, keywords, caption text] (80)  
7 (education\$ adj3 tool).mp. [mp=title, short title, abstract, full text, keywords, caption text] (13)  
8 (family or family relations).mp. [mp=title, short title, abstract, full text, keywords, caption text] (1736)  
9 or/1-8 (2557)  
10 (decision making or choice behavior or "dissent and disputes" or negotiating).mp. [mp=title, short title, abstract, full text, keywords, caption text] (802)  
11 (advance directives or living wills or contracts or informed consent or consent forms or third-party consent or presumed consent or resuscitation orders).mp. [mp=title, short title, abstract, full text, keywords, caption text] (395)  
12 (patient care planning or advance care planning or advance directives or living wills or critical pathways or patient-centered care).mp. [mp=title, short title, abstract, full text, keywords, caption text] (70)  
13 (deci\$ adj3 mak\$).mp. [mp=title, short title, abstract, full text, keywords, caption text] (1041)  
14 advance care planning.mp. [mp=title, short title, abstract, full text, keywords, caption text] (8)  
15 or/10-14 (1374)  
16 (resuscitation or Cardiopulmonary Resuscitation).mp. [mp=title, short title, abstract, full text, keywords, caption text] (245)  
17 (life support care or advanced cardiac life support or advanced trauma life support care).mp. [mp=title, short title, abstract, full text, keywords, caption text] (11)  
18 (Terminal Care or Withholding Treatment or Life Support Care or withdrawing life support or Euthanasia, Passive).mp. [mp=title, short title, abstract, full text, keywords, caption text] (52)  
19 (resuscitation orders or DNR).mp. [mp=title, short title, abstract, full text, keywords, caption text] (4)  
20 (critical illness or emergencies).mp. [mp=title, short title, abstract, full text, keywords, caption text] (154)  
21 (Emergency Service, Hospital or Hospital Rapid Response Team).mp. [mp=title, short title, abstract, full text, keywords, caption text] (26)  
22 Heart Arrest.mp. [mp=title, short title, abstract, full text, keywords, caption text] (18)  
23 cardiac arrest.mp. [mp=title, short title, abstract, full text, keywords, caption text] (145)  
24 (Respiration, Artificial or artificial respiration).mp. [mp=title, short title, abstract, full text, keywords, caption text] (87)  
25 or/16-24 (611)  
26 9 and 15 and 25 (61)

**ERIC (1966-July 2014)**

| Search ID# | Search Terms                                                                       |
|------------|------------------------------------------------------------------------------------|
| 1          | exp communication strategies/ or exp communications                                |
| 2          | exp Physician Patient Relationship/                                                |
| 3          | (communic\$ adj3 tool\$.mp.                                                        |
| 4          | (communic\$ adj3 skill\$.mp.                                                       |
| 5          | (communic\$ adj3 intervention\$.mp.                                                |
| 6          | (education\$ adj3 tool\$.mp.                                                       |
| 7          | exp Medical Education/                                                             |
| 8          | or/1-7                                                                             |
| 9          | (medical decision making or decision making).mp. or exp decision making/           |
| 10         | exp Medical Services/ or medical treatment.mp.                                     |
| 11         | exp Death/ or exp Decision Making/ or advance directive\$.mp.                      |
| 12         | living will.mp.                                                                    |
| 13         | care planning.mp.                                                                  |
| 14         | advance\$ directive\$.mp.                                                          |
| 15         | advance\$ care plan\$.mp.                                                          |
| 16         | (deci\$ adj3 mak\$.mp.                                                             |
| 17         | or/9-16                                                                            |
| 18         | end-of-life.mp                                                                     |
| 19         | (resuscitation or emergency or intensive or critical).mp.                          |
| 20         | exp first aid/ or CPR.mp. or cardiopulmonary.mp. or arrest.mp. or life support.mp. |
| 21         | DNR.mp.                                                                            |
| 22         | or/18-21                                                                           |
| 23         | 8 and 17 and 22                                                                    |
