# Supplementary material for: Communication Tools for End-of-Life Decision-Making in Ambulatory Care Settings: A Systematic Review and Meta-Analysis
Source: PubMed Central journal article supplement (PMC4847908; doi:10.1371/journal.pone.0150671), 2016-04-27
Supplement: pone.0150671.s003.pdf [file pone.0150671.s003.pdf]

Supporting information Table 2: Characteristics of included studies

| Study ID              | Sample Size                      | Population Description                                                                                                                                           | Country   | Design                                   | Target of Intervention   | Intervention                                                                                                                                                                                                                                                        | Comparator                                                                                                                                     | Measured Outcome                                                                                                                                                                                                                 |
|-----------------------|----------------------------------|------------------------------------------------------------------------------------------------------------------------------------------------------------------|-----------|------------------------------------------|--------------------------|---------------------------------------------------------------------------------------------------------------------------------------------------------------------------------------------------------------------------------------------------------------------|------------------------------------------------------------------------------------------------------------------------------------------------|----------------------------------------------------------------------------------------------------------------------------------------------------------------------------------------------------------------------------------|
| Au 2012               | Intervention 194<br>Control 182  | Patients attending outpatient COPD clinics with outpatient responsible for their COPD care                                                                       | USA       | RCT (Cluster-randomized at level of HCP) | • Patient<br>• HCP       | Patients completed baseline questionnaires, including preferences for advance directives. These were used to generate patient-specific feedback forms, which were shared with patients and their clinicians at their next scheduled visit.                          | Usual care                                                                                                                                     | • Occurrence of EoL/AD Discussion<br>• Quality of Communication between SDM and Patient<br>• Quality of Communication with HCP                                                                                                   |
| Barrio-Cantalejo 2009 | Intervention 64<br>Control 59    | Adults attending primary care clinics with an identified SDM                                                                                                     | Spain     | RCT (3 arms)                             | • Patient                | Patients completed the regional advance directive form, plus had a shared discussion with their SDMs about goals of care.                                                                                                                                           | Usual care                                                                                                                                     | • Surrogate and Patient EoL Preference Congruence                                                                                                                                                                                |
| Bonner 2014           | Intervention 35<br>Control 35    | SDMs of African-American patients with dementia, living in the community                                                                                         | USA       | Pre/post                                 | • Surrogate              | ACT-Plan intervention: 4 once-weekly sessions to enhance knowledge, self-efficacy, and behaviours needed to make end-of-life treatment plans with dementia, guided by an advance nurse practitioner.                                                                | Four once-weekly sessions on health promotion topics.                                                                                          | • Knowledge/Literacy of EoL treatment options<br>• Preference on Life Sustaining Treatment Options<br>• Decisional Comfort/Confidence in EoL Plan                                                                                |
| Briggs 2004           | Intervention 13<br>Control 14    | Patients age>50 recruited from congestive heart failure, dialysis, or cardiovascular surgery clinic, able to identify an SDM                                     | USA       | RCT                                      | • Patient<br>• Surrogate | PC-ACP 1 hour meeting reviewing patient's medical conditions, advance care planning, patient values, and a summary.                                                                                                                                                 | Usual care                                                                                                                                     | • Knowledge/Literacy of EoL treatment options<br>• Decisional Comfort/Confidence in EoL Plan<br>• Surrogate and Patient EoL Preference Congruence<br>• Quality of Communication with HCP                                         |
| Brown 1999            | Intervention 619<br>Control 628  | Cognitively intact patients age>75 attending a primary care clinic                                                                                               | USA       | RCT                                      | • Patient                | Intervention participants were sent the "You and Your Choices" plus the Peace of Mind: Advanced Directives Video, along with a follow-up postcard and questionnaire.                                                                                                | "You and Your Choices" written materials alone                                                                                                 | • Advance Directives Completion<br>• Acceptability of Tool                                                                                                                                                                       |
| Chan 2010             | Intervention 59<br>Control 62    | Cantonese-speaking adults age>65 with at least one moderate to severe health problem, living in a nursing home.                                                  | China     | Cohort                                   | • Patient                | "Let Me Talk" advance care planning program elicits patient values and concerns, and preferences for end of life care, facilitated by a nurse practitioner, and summarized in a personalized booklet.                                                               | Usual care                                                                                                                                     | • Occurrence of EoL/AD Discussion<br>• Knowledge/Literacy of EoL treatment options<br>• Quality of Communication between SDM and Patient                                                                                         |
| Clayton 2007          | Intervention 92<br>Control 82    | Patients with malignancy referred to palliative care services                                                                                                    | Australia | RCT                                      | • Patient                | Palliative Care Question Prompt List (CPL), a 16 page booklet addressing 9 palliative care topics                                                                                                                                                                   | Usual care                                                                                                                                     | • Occurrence of EoL/AD Discussion<br>• Satisfaction with EoL care and care planning<br>• Acceptability of Tool                                                                                                                   |
| Deep 2010             | 120 Pre/Post participants        | Patients age>40 attending an outpatient general medicine clinic, without close relationships to patients with dementia.                                          | USA       | Pre/post                                 | • Patient                | Verbal description of advanced dementia, followed by 2 minute video depicting a female patient with severe dementia, based on Functional Assessment Staging (FAST).                                                                                                 | Verbal description alone                                                                                                                       | • Preference on Life Sustaining Treatment Options                                                                                                                                                                                |
| Dexter 1998           | Intervention 219<br>Control 253  | Patients age>75 or age>50 and cardiac ischemia, CHF, chronic lung disease, cancer, cerebrovascular disease, CKD, cirrhosis                                       | USA       | RCT                                      | • HCP                    | Physician EMR reminders to discuss ACP                                                                                                                                                                                                                              | Usual care                                                                                                                                     | • Advance Directives Completion<br>• Occurrence of EoL/AD Discussion                                                                                                                                                             |
| Ditto 2001            | Intervention 82<br>Control 80    | Patients age >65 from outpatient primary care practices, with an identifiable SDM                                                                                | USA       | RCT                                      | • Patient<br>• Surrogate | Valued Life Activities Directive, a value-based advance directive, followed by discussion with SDM about values and preferences under the supervision of interviewer                                                                                                | Usual care                                                                                                                                     | • Knowledge/Literacy of EoL treatment options<br>• Decisional Comfort/Confidence in EoL Plan                                                                                                                                     |
| Dyar 2012             | Intervention 12<br>Control 14    | Outpatient cancer clinic patients with metastatic cancer and expected referral to hospice within 12 months                                                       | USA       | RCT                                      | • Patient                | "Five Wishes" and living will forms, and visit with an oncology nurse practitioner to address patient needs.                                                                                                                                                        | Usual care                                                                                                                                     | • Satisfaction with EoL care and care planning<br>• Knowledge/Literacy of EoL treatment options                                                                                                                                  |
| Einterz 2014          | 18 Pre/Post participants         | Surrogate decision makers of patients with moderate to severe dementia living in a nursing home.                                                                 | USA       | Pre/post                                 | • Surrogate              | An 18 minute video decision aid on dementia prognosis, treatment, elicitation of values and principles of substitute decision-making for end-of-life decisions, followed by a structured meeting with the SDM, patient, and interdisciplinary team within 3 months. | N/A                                                                                                                                            | • Satisfaction with EoL care and care planning<br>• Knowledge/Literacy of EoL treatment options<br>• Quality of Communication with HCP<br>• Surrogate and HCP EoL Goals of care congruence                                       |
| El-Jawahri 2010       | Intervention 23<br>Control 27    | Oncology clinic patients with a diagnosis of malignant glioma.                                                                                                   | USA       | RCT                                      | • Patient                | Brief (6 minute) video presenting three levels of medical care: life-prolonging (ICU, ventilation, CPR); basic medical care (IV medications and oxygen); and comfort care (hospice with medications and help with self-care                                         | Verbal description of the same three levels of medical care.                                                                                   | • Knowledge/Literacy of EoL treatment options<br>• Preference on Life Sustaining Treatment Options<br>• Decisional Comfort/Confidence in EoL Plan<br>• Acceptability of Tool                                                     |
| Engelhardt 2006       | Intervention 133<br>Control 142  | Outpatients at high risk of death due to cancer, CHF, or COPD, from clinics at 3 veterans' centres, a home care organization, and two managed care organizations | USA       | RCT                                      | • Patient                | Advanced illness coordinated care program, a six-session in intervention with counselling, education, and care coordination                                                                                                                                         | Usual care                                                                                                                                     | • Advance Directives Completion<br>• Health Care Utilization<br>• Satisfaction with EoL care and care planning                                                                                                                   |
| Engelhardt 2009       | Intervention 267<br>Control 265  | Outpatients at high risk of death due to cancer, CHF, pulmonary disease, or ESRD in one health care system                                                       | USA       | RCT                                      | • Patient                | Advanced illness coordinated care program, a six-session in intervention with counselling, education, and care coordination                                                                                                                                         | Usual care                                                                                                                                     | • Advance Directives Completion<br>• Health Care Utilization                                                                                                                                                                     |
| Epstein 2013          | Intervention 30<br>Control 26    | Outpatients with advanced, incurable GI malignancies from a regional oncology clinic who had not completed advanced directives                                   | USA       | RCT                                      | • Patient                | A 3 minute video with narration and images of CPR and mechanical ventilation, and probability of survival for patients with advanced cancer                                                                                                                         | Identical information presented orally, without the video                                                                                      | • Advance Directives Completion<br>• Health Care Utilization<br>• Advance Directives Completion<br>• Knowledge/Literacy of EoL treatment options<br>• Preference on Life Sustaining Treatment Options<br>• Acceptability of Tool |
| Fung 2010             | 100 Pre/Post participants        | Participants recruited from residential homes and seniors community centers; capable of understanding Cantonese                                                  | China     | Pre/post                                 | • Patient                | Two hypothetical scenarios, one about dementia and the other about COPD, were used to discuss decision-making with regard to life-sustaining therapies.                                                                                                             | N/A                                                                                                                                            | • Knowledge/Literacy of EoL treatment options                                                                                                                                                                                    |
| Grimaldo 2001         | Intervention 99<br>Control 99    | Patients age >65 scheduled for surgery anticipated to require hospital admission overnight                                                                       | USA       | RCT                                      | • Patient                | 10 minute information session discussing CPR, mechanical ventilation, and the importance of discussing EOL with their SDM. All patients received an advanced directives form.                                                                                       | Usual care                                                                                                                                     | • Advance Directives Completion<br>• Occurrence of EoL/AD Discussion<br>• Preference on Life Sustaining Treatment Options<br>• Quality of Communication between SDM and Patient                                                  |
| Guthell 2005          | Intervention 27<br>Control 22    | Elderly patients enrolled in a seniors centre with an identified substitute decision maker.                                                                      | USA       | RCT                                      | • Patient<br>• Surrogate | Four 1-hour teaching sessions on advance directives, substitute decision making, communication of values, and review of advance directives forms.                                                                                                                   | Usual care                                                                                                                                     | • Satisfaction with EoL care and care planning<br>• Knowledge/Literacy of EoL treatment options<br>• Quality of Communication between SDM and Patient                                                                            |
| Hanson 2005           | 346 Pre/Post participants        | Residents of seven community nursing homes                                                                                                                       | USA       | Pre/post                                 | • Surrogate              | Quality improvement program in palliative care, including creation of a palliative care team with skills in advance care plans, and creation of procedures and documentation tools to enhance ACP.                                                                  | Usual care                                                                                                                                     | • Advance Directives Completion<br>• Occurrence of EoL/AD Discussion<br>• Concordance documented AD and desired care                                                                                                             |
| Hare 1991             | Intervention 52<br>Control 55    | Adult patients from a tertiary-care outpatient internal medicine clinic.                                                                                         | USA       | Cohort                                   | • Patient                | Patients received a booklet as well as a physician-initiated advance directives discussion at their scheduled clinic visit.                                                                                                                                         | Usual care                                                                                                                                     | • Advance Directives Completion                                                                                                                                                                                                  |
| Heffner 1997          | Intervention 50<br>Control 43    | Adult patients attending outpatient pulmonary rehabilitation                                                                                                     | USA       | Cohort                                   | • Patient                | Educational workshop on advanced directives and end-of-life issues, including a 15 minute video and discussion led by a nurse educator. Patients were given AD forms to complete.                                                                                   | Usual care                                                                                                                                     | • Advance Directives Completion<br>• Occurrence of EoL/AD Discussion<br>• Quality of Communication with HCP                                                                                                                      |
| Heiman 2004           | Intervention 385<br>Control 334  | Patients age>70 or age>50 with HIV, cancer, cardiomyopathy, pulmonary edema, CVA, cirrhosis, ESRD, CKD, COPD, paraplegia or quadriplegia, ALS                    | USA       | RCT (Cluster)                            | • HCP                    | Physician EMR reminder to discuss ACP                                                                                                                                                                                                                               | Usual care                                                                                                                                     | • Advance Directives Completion<br>• Occurrence of EoL/AD Discussion                                                                                                                                                             |
| High 1993             | Intervention 311<br>Control 120  | Patients recruited from 8 seniors homes, a volunteer pool of elderly at the University, and two geriatric clinics                                                | USA       | RCT                                      | • Patient                | Written materials plus meeting                                                                                                                                                                                                                                      | Meetings alone                                                                                                                                 | • Advance Directives Completion                                                                                                                                                                                                  |
| Hossler 2011          | 17 Pre/Post participants         | Individuals being treated at a clinic for amyotrophic lateral sclerosis                                                                                          | USA       | Pre/post                                 | • Patient                | Participants completed a computer-based decision aid to clarify values and make advance care plans                                                                                                                                                                  | N/A                                                                                                                                            | • Decisional Comfort/Confidence in EoL Plan<br>• Acceptability of Tool                                                                                                                                                           |
| Jones 2011            | Intervention 43<br>Control 34    | Oncology patients who had completed a course of treatment for malignancy with residual active disease.                                                           | UK        | RCT                                      | • Patient                | Meeting with trained facilitator with checklist to discuss end-of-life issues. Patients provided with ADEs to complete.                                                                                                                                             | Usual care                                                                                                                                     | • Satisfaction with EoL care and care planning<br>• Quality of Communication between SDM and Patient<br>• Quality of Communication with HCP                                                                                      |
| Kirchoff 2010         | Intervention 160<br>Control 153  | Adult outpatients from congestive heart failure or dialysis clinics                                                                                              | USA       | RCT                                      | • Patient<br>• Surrogate | "Respecting Choices" intervention. Participants received to pamphlets which describe ACP and prompt them to consider personal goals and values for end of life care, followed by a discussion with a trained facilitator, and documentation.                        | Usual care                                                                                                                                     | • Knowledge/Literacy of EoL treatment options<br>• Quality of Communication with HCP                                                                                                                                             |
| Kirchoff 2012         | Intervention 160<br>Control 153  | Adult patients with end-stage renal disease or congestive heart failure at two hospital clinics                                                                  | USA       | RCT                                      | • Patient<br>• Surrogate | Patients with SDMs were interviewed by a skilled facilitator to assess understanding of disease, treatment options, and documentation of patient preferences                                                                                                        | Usual care                                                                                                                                     | • Concordance of desired care and delivered care<br>• Preference on Life Sustaining Treatment Options                                                                                                                            |
| Kressel 2007          | Intervention 39<br>Control 36    | Patients age>65 attending an academic general internal medicine practice                                                                                         | USA       | Cohort                                   | • Patient                | Patients in the intervention arm reviewed an advance directive where the check box allowed one to 'opt out' of treatment                                                                                                                                            | Patients in the control reviewed an advance directive where the check box allowed one to 'opt in' to treatments                                | • Preference on Life Sustaining Treatment Options                                                                                                                                                                                |
| Landry 1997           | Intervention 95<br>Control 92    | Adult patients from the general internal medicine clinic                                                                                                         | USA       | RCT                                      | • Patient                | Educational seminar- 10 minute presentation on advance directives, organ donation, power of attorney, 15 minute presentation on advance directive, 30 minute discussion period, 10 minutes to fill out advance directives form                                      | Information packet and advance directive form                                                                                                  | • Advance Directives Completion<br>• Quality of Communication between SDM and Patient                                                                                                                                            |
| Molloy 2000           | Intervention 636<br>Control 656  | 6 matched nursing homes for elderly patients                                                                                                                     | Canada    | RCT (Cluster)                            | • Patient                | Let me decide' advance directive along with meeting with health care facilitators to discuss treatment options                                                                                                                                                      | Usual care                                                                                                                                     | • Advance Directives Completion                                                                                                                                                                                                  |
| Morrison 2005         | Intervention 43<br>Control 96    | Adults admitted to a long-term using home                                                                                                                        | USA       | RCT                                      | • HCP                    | Social workers received half day training on conducting ACP discussions, capacity assessment                                                                                                                                                                        | Usual care                                                                                                                                     | • Advance Directives Completion<br>• Concordance of desired care and delivered care                                                                                                                                              |
| Murphy 1994           | 287 Pre/Post participants        | Adults age>60 attending an ambulatory geriatric clinic                                                                                                           | USA       | Pre/post                                 | • Patient                | Patients were shown a pie chart of CPR outcomes, including survival and functional status                                                                                                                                                                           | N/A                                                                                                                                            | • Preference on Life Sustaining Treatment Options                                                                                                                                                                                |
| Murphy 2000           | 31 Pre/Post participants         | Senior citizens attending a multipurpose community senior citizens center                                                                                        | USA       | Pre/post                                 | • Patient                | Computer program reviewing information on advance directives, treatment options, and how to express preferences and values.                                                                                                                                         | N/A                                                                                                                                            | • Satisfaction with EoL care and care planning<br>• Knowledge/Literacy of EoL treatment options                                                                                                                                  |
| Pearlman 2005         | Intervention 136<br>Control 144  | Patients aged >55 recruited from from primary care clinics                                                                                                       | USA       | RCT                                      | • Patient<br>• HCP       | Mailed "Your Life, Your Choices" booklet, a 30 minute appointment with a social worker, and an appointment flag with the care provider to discuss ACP                                                                                                               | Usual care plus the hospital's standard advance directives package                                                                             | • Advance Directives Completion<br>• Occurrence of EoL/AD Discussion<br>• Surrogate and Patient EoL Preference Congruence                                                                                                        |
| Perry 2005            | Intervention 63<br>Control 59    | Outpatients from 21 dialysis units who had not completed advanced directives                                                                                     | USA       | RCT                                      | • Patient                | Peer mentoring from ERSB patients trained to discuss AD; 5 telephone meetings and 3 face-to-face, for the purpose of education about AD and addressing worries about AD                                                                                             | Printed materials on advanced directives                                                                                                       | • Advance Directives Completion                                                                                                                                                                                                  |
| Reilly 1995           | Intervention 83<br>Control 79    | Patients recently discharged from hospital admission to home, without prior advance directives                                                                   | USA       | RCT                                      | • Patient                | Interviewed by physician during admission regarding prior advance care plans, mailed 8-page advanced directives booklet including advance directives forms                                                                                                          | Usual care, including interview during admission by physician regarding advance care planning                                                  | • Advance Directives Completion                                                                                                                                                                                                  |
| Reinke 2011           | 7 Pre/Post participants          | Patients with severe COPD, previous participation in dyspnea self-management program, and were interested in learning about end-of-life issues.                  | USA       | Pre/post                                 | • Patient                | 60 minute webinar and online open peer-group discussions on end-of-life topics and decision-making.                                                                                                                                                                 | N/A                                                                                                                                            | • Satisfaction with EoL care and care planning<br>• Acceptability of Tool<br>• Quality of Communication between SDM and Patient                                                                                                  |
| Rhondali 2013         | Intervention 45<br>Control 35    | Patients with advanced cancer attending a supportive care clinic                                                                                                 | USA       | RCT (Crossover)                          | • Patient                | Video of physician asking what the patient preferred in the event of cardiac arrest, crossing over to a video of the physician recommending DNR                                                                                                                     | Video of the physician recommending DNR, followed by a video of the physician asking what the patient preferred in the event of cardiac arrest | • Satisfaction with EoL care and care planning<br>• Preference on Life Sustaining Treatment Options                                                                                                                              |
| Richter 1995          | Intervention 87<br>Control 89    | Adult patients at an internal medicine outpatient clinic                                                                                                         | USA       | RCT                                      | • Patient                | Patients were given advanced directives forms and information materials at their clinic visit, with a mailed reminder 2 weeks later, with a request to have the forms completed by a certain date.                                                                  | Usual care, with a copy of an advanced directives brochure from the clinic nurse.                                                              | • Advance Directives Completion                                                                                                                                                                                                  |
| Rubin 1994            | Intervention 552<br>Control 549  | Patients age>65 recently discharged from a hospital stay of 3 days or greater                                                                                    | USA       | RCT                                      | • Patient                | Patients were mailed a letter, a form reviewing advance directives and a power of attorney form, with follow-up letter and forms sent again at 4 week follow-up                                                                                                     | Usual care                                                                                                                                     | • Advance Directives Completion                                                                                                                                                                                                  |
| Sachs 1992            | Intervention 48<br>Control 83    | Patients age>65 with more than one visit to a university geriatrics clinic                                                                                       | USA       | RCT                                      | • Patient                | 30 minute interview exploring knowledge of advance directives, and teaching involving case vignettes. Patients were given advance directive forms, and a reminder card to discuss AD at next clinic visit.                                                          | Usual care                                                                                                                                     | • Advance Directives Completion<br>• Occurrence of EoL/AD Discussion                                                                                                                                                             |
| Schneiderman 1992     | Intervention 104<br>Control 100  | Patients with life threatening disease, with estimated life expectancy <5 years                                                                                  | USA       | RCT                                      | • Patient                | Discussion about advance directives in clinic, and provision of advance directives forms                                                                                                                                                                            | Usual care                                                                                                                                     | • Preference on Life Sustaining Treatment Options<br>• Health Care Utilization                                                                                                                                                   |
| Schonwetter 1991      | 64 Pre/Post participants         | Patients aged 75 or greater from an outpatient geriatrics patient                                                                                                | USA       | Pre/post                                 | • Patient                | Patients were given a description of cardiac arrest, CPR, risks and benefits of treatment, and told that the decision whether or not to undergo CPR was up to the patient.                                                                                          | N/A                                                                                                                                            | • Knowledge/Literacy of EoL treatment options                                                                                                                                                                                    |
| Schonwetter 1993      | 102 Pre/Post participants        | Adults residing in an retirement-home community                                                                                                                  | USA       | Pre/post                                 | • Patient                | Patients were given a description of cardiac arrest, CPR, risks and benefits of treatment, and provide CPR preferences for 5 scenarios.                                                                                                                             | N/A                                                                                                                                            | • Knowledge/Literacy of EoL treatment options                                                                                                                                                                                    |
| Schwartz 2002         | Intervention 30<br>Control 30    | Ambulatory geriatric patients with a chronic or life-threatening disease.                                                                                        | USA       | RCT                                      | • Patient                | "Respecting Choices" intervention. Participants received to pamphlets which describe ACP and prompt them to consider personal goals and values for end of life care, followed by a discussion with a trained facilitator, and documentation.                        | Local advance directives forms to take home and complete.                                                                                      | • Knowledge/Literacy of EoL treatment options<br>• Surrogate and Patient EoL Preference Congruence                                                                                                                               |
| Siegert 1996          | Intervention 16<br>Control 20    | Patients age greater than 40 staying in an extended care and rehabilitation centre                                                                               | USA       | RCT                                      | • Patient                | Participants received written educational materials on advance directives, followed by a video on advance directives.                                                                                                                                               | Written educational materials, followed by a video tape on diet and exercise                                                                   | • Knowledge/Literacy of EoL treatment options                                                                                                                                                                                    |
| Singer 1995           | Intervention 95<br>Control 95    | Patients recruited from 6 dialysis units in Toronto                                                                                                              | Canada    | RCT                                      | • Patient                | Dialysis-specific advance directive                                                                                                                                                                                                                                 | Generic advance directive form                                                                                                                 | • Preference for completing advance directive<br>• Decisional Comfort/Confidence in EoL Plan<br>• Acceptability of Tool                                                                                                          |
| Singer 1997           | Intervention 101<br>Control 101  | Patients with HIV recruited from the AIDS committee of Toronto and the hospital HIV clinic                                                                       | Canada    | RCT                                      | • Patient                | HIV-specific advance directive                                                                                                                                                                                                                                      | Generic advance directive form                                                                                                                 | • Preference for completing advance directive<br>• Decisional Comfort/Confidence in EoL Plan<br>• Acceptability of Tool                                                                                                          |
| Smucker 1993          | Intervention 85<br>Control 15    | Patients age>65 attending an urban family practice clinic                                                                                                        | USA       | RCT                                      | • Patient                | Physician initiated discussion on advance directives                                                                                                                                                                                                                | Usual care                                                                                                                                     | • Surrogate and HCP EoL Goals of care congruence                                                                                                                                                                                 |
| Song 2005             | Intervention 16<br>Control 16    | Patients age>50 in cardiac surgery clinic, scheduled for an operating, with an identified SDM                                                                    | USA       | RCT                                      | • Patient<br>• Surrogate | PC-ACP 1 hour meeting reviewing patient's medical conditions, advance care planning, patient values, and a summary.                                                                                                                                                 | Usual care                                                                                                                                     | • Knowledge/Literacy of EoL treatment options<br>• Decisional Comfort/Confidence in EoL Plan<br>• Surrogate and Patient EoL Preference Congruence                                                                                |
| Song 2009             | Intervention 29<br>Control 29    | Self-identified African-Americans receiving dialysis for at least 3 months, with an identified SDM                                                               | USA       | RCT                                      | • Patient                | SPiRiT, a one hour interview with a patient and SDM by a trained nurse practitioner, to explore values, beliefs, and advance directives.                                                                                                                            | Social worker at the dialysis clinic provided written information on advance directives.                                                       | • Quality of Communication with HCP                                                                                                                                                                                              |
| Song 2010             | Intervention 11<br>Control 8     | African-american patients receiving hemodialysis for 3 or more months, with an identified SDM                                                                    | USA       | RCT                                      | • Patient<br>• Surrogate | PC-ACP 1 hour meeting reviewing ESRD, advance care planning, patient values, and a summary, in addition to written information on advance directives provided by nurse or social worker.                                                                            | Written information on advance directives provided by nurse or social worker.                                                                  | • Surrogate and Patient EoL Preference Congruence<br>• Quality of Communication with HCP                                                                                                                                         |
| Sudore 2007           | Intervention 103<br>Control 102  | Cognitively intact patients age>50, attending a general medicine clinic                                                                                          | USA       | RCT                                      | • Patient                | Intervention patients received a revised advance directives form with large font and simplified text at a 5th grade reading level.                                                                                                                                  | Standard advance directives form                                                                                                               | • Advance Directives Completion<br>• Knowledge/Literacy of EoL treatment options<br>• Acceptability of Tool                                                                                                                      |
| Sudore 2014           | 43 Pre/Post participants         | English speaking adults over age 60 from three low-income seniors centers                                                                                        | USA       | Pre/post                                 | • Patient                | PREPARE: a web-based program to help patients with ACP and selection and communication of ACP to the SDM and physicians.                                                                                                                                            | N/A                                                                                                                                            | • Advance Directives Completion<br>• Occurrence of EoL/AD Discussion<br>• Quality of Communication between SDM and Patient                                                                                                       |
| Sulmasy 1996          | Intervention 63<br>Control 101   | Patients>18 and <90 who had twice visited an internal medicine ambulatory care practice within the preceding 3 months                                            | USA       | RCT                                      | • Patient                | Patients received a booklet about advance directives and a copy of advance directive forms to discuss with their physician on that visit. Follow up visit with a graduate student before or after the visit were also offered                                       | Usual care                                                                                                                                     | • Advance Directives Completion<br>• Occurrence of EoL/AD Discussion                                                                                                                                                             |
| Volandes 2007         | 120 Pre/Post participants        | Patients age>40 attending an outpatient general medicine clinic, without close relationships to patients with dementia.                                          | USA       | Pre/post                                 | • Patient                | Verbal description of advanced dementia, followed by a 2 video depicting advanced dementia.                                                                                                                                                                         | N/A                                                                                                                                            | • Preference on Life Sustaining Treatment Options                                                                                                                                                                                |
| Volandes 2009 (a)     | Intervention 94<br>Control 106   | Adults age >65 from outpatient geriatric and primary care clinics                                                                                                | USA       | RCT                                      | • Patient                | Verbal description of advanced dementia, followed by video decision support tool showing advanced dementia in a nursing home setting.                                                                                                                               | Verbal description alone                                                                                                                       | • Preference on Life Sustaining Treatment Options                                                                                                                                                                                |
| Volandes 2009 (b)     | Intervention 8<br>Control 6      | Patients age>65, with identified SDMs, attending outpatient geriatric clinics                                                                                    | USA       | RCT                                      | • Patient<br>• Surrogate | Verbal description of advanced dementia, followed by a 2 video depicting advanced dementia.                                                                                                                                                                         | Written description alone                                                                                                                      | • Surrogate and Patient EoL Preference Congruence                                                                                                                                                                                |
| Volandes 2010         | 146 Pre/Post participants        | Patients age>40 attending an outpatient general medicine clinic, without close relationships to patients with dementia.                                          | USA       | Pre/post                                 | • Patient                | Verbal description of advanced dementia, followed by a 2 video depicting advanced dementia.                                                                                                                                                                         | Verbal description alone                                                                                                                       | • Preference on Life Sustaining Treatment Options<br>• Decisional Comfort/Confidence in EoL Plan                                                                                                                                 |
| Volandes 2011         | 33 Intervention<br>44 Control    | Patients age>65 attending an outpatient primary care clinic                                                                                                      | USA       | RCT                                      | • Patient                | Patients received a verbal description of advanced dementia, followed by a video showing three levels of care: life-prolonging (CPR, MV, ICU); basic care (hospital, IV, oxygen) followed by a 6 minute video illustrating the three choices.                       | Verbal description of dementia and different levels of care alone                                                                              | • Preference on Life Sustaining Treatment Options                                                                                                                                                                                |
| Volandes 2012 (a)     | Intervention 79<br>Control 80    | Oncology cancer patients with life expectancy less than 1 year.                                                                                                  | USA       | RCT                                      | • Patient                | Verbal narrative about CPR followed by 3 minutes video demonstrating chest compressions, intubation, and a ventilated patient receiving care in ICU                                                                                                                 | Verbal narrative of CPR alone                                                                                                                  | • Knowledge/Literacy of EoL treatment options<br>• Preference on Life Sustaining Treatment Options                                                                                                                               |
| Volandes 2012 (b)     | 80 Pre/Post participants         | Patients with advanced cancer, whose primary goals of treatment were palliative, from an outpatient oncology centre.                                             | USA       | Pre/post                                 | • Patient                | Patients received a verbal description of three levels of care: life-prolonging (CPR, MV, ICU); basic care (hospital, IV, oxygen) and comfort care (hospice with medications and help with self-care                                                                | N/A                                                                                                                                            | • Preference on Life Sustaining Treatment Options                                                                                                                                                                                |
| Volandes 2012 (c)     | Intervention 50<br>Control 51    | Patients age >65 residing in a skilled nursing facility                                                                                                          | USA       | RCT                                      | • Patient                | Brief (6 minute) video presenting three levels of medical care: life-prolonging (ICU, ventilation, CPR); basic medical care (IV medications and oxygen); and comfort care (hospice with medications and help with self-care                                         | Verbal description of three levels of care alone                                                                                               | • Preference on Life Sustaining Treatment Options<br>• Acceptability of Tool                                                                                                                                                     |
| Wilson 2005           | 33 Pre/Post participants         | Patients with severe COPD attending an outpatient pulmonary rehab unit.                                                                                          | Canada    | Pre/post                                 | • Patient                | Participants received a portable, self-administered audio booklet, describing the prognosis of COPD, and the risks and benefits of mechanical ventilation.                                                                                                          | N/A                                                                                                                                            | • Preference on Life Sustaining Treatment Options<br>• Decisional Comfort/Confidence in EoL Plan                                                                                                                                 |
| Wissow 2004           | Intervention 842<br>Control 1278 | Elderly patients (age>65) attending ambulatory clinics in a major health system                                                                                  | USA       | Cohort                                   | • HCP<br>• System        | Multiple interventions to improve use of AD, including a presentation to MDs, site visits, booklet with information on ACP                                                                                                                                          | Usual care                                                                                                                                     | • Advance Directives Completion                                                                                                                                                                                                  |
| Yamada 1999           | Intervention 62<br>Control 55    | Veterans age>70, deemed capable of medical decision-making                                                                                                       | USA       | RCT                                      | • Patient                | Pamphlet about CPR and outcomes, 10 minute video about advanced directives, and pamphlet about advanced directives that does not discuss CPR                                                                                                                        | Pamphlet about advanced directives which does not discuss CPR                                                                                  | • Advance Directives Completion<br>• Knowledge/Literacy of EoL treatment options<br>• Preference on Life Sustaining Treatment Options<br>• Quality of Communication between SDM and Patient                                      |
